# Supplementary material for: High-Pressure Extraction of Antioxidant-Rich Fractions from Shrubby Cinquefoil (Dasiphora fruticosa L. Rydb.) Leaves: Process Optimization and Extract Characterization
Source: PubMed Central journal article supplement (PMC7346160; doi:10.3390/antiox9060457), 2020-05-26
Supplement: antioxidants-09-00457-s001.pdf [file antioxidants-09-00457-s001.pdf]

Article

# High-Pressure Extraction of Antioxidant-Rich Fractions from Shrubby Cinquefoil (*Dasiphora fruticosa* L. Rydb.) Leaves: Process Optimization and Extract Characterization

Michail Syrpas\*, Kiran Subbarayadu, Vaida Kitrytė and Petras Rimantas Venskutonis<sup>1</sup>

<sup>1</sup> Kaunas University of Technology, Department of Food Science & Technology, Radvilėnų pl. 19, LT-50254 Kaunas, Lithuania; michail.syrpas@ktu.lt (M.S.); kiran.subbarayadu@ktu.lt (K.S.); vaida.kitryte@ktu.lt (V.K.); rimas.venskutonis@ktu.lt (P.R.V.)

\* Correspondence: michail.syrpas@ktu.lt

SUPPLEMENTARY MATERIALS

**Table S1.** Analysis of variance of the regression parameters for PLE-Ac response surface quadratic model of *D. fruticosa* leaves for the response factors PLE-Ac extract yield (g/100 g of residue after SFE-CO<sub>2</sub>) and total phenolic content (mg GAE/g of residue after SFE-CO<sub>2</sub>)

| Source                                                                          | SS      | df | MS     | F      | p-value   |
|---------------------------------------------------------------------------------|---------|----|--------|--------|-----------|
| <b>RF I: PLE-Ac extract yield (g/100 g of residue after SFE-CO<sub>2</sub>)</b> |         |    |        |        |           |
| Model                                                                           | 72.54   | 5  | 14.51  | 109.82 | < 0.0001* |
| Time ( $\tau$ , min)                                                            | 17.48   | 1  | 17.48  | 132.30 | < 0.0001* |
| Temperature (T, °C)                                                             | 54.06   | 1  | 54.06  | 409.26 | < 0.0001* |
| $\tau$ T                                                                        | 0.7056  | 1  | 0.7056 | 5.34   | 0.0541**  |
| $\tau^2$                                                                        | 0.2768  | 1  | 0.2768 | 2.10   | 0.1910**  |
| T <sup>2</sup>                                                                  | 0.0065  | 1  | 0.0065 | 0.0491 | 0.8310**  |
| Residual                                                                        | 0.9247  | 7  | 0.1321 |        |           |
| Lack of fit                                                                     | 0.6403  | 3  | 0.2134 | 3.00   | 0.1580**  |
| Pure error                                                                      | 0.2844  | 4  | 0.0711 |        |           |
| Total SS                                                                        | 73.46   | 12 |        |        |           |
| <b>RF II: TPC (mg GAE/g of residue after SFE-CO<sub>2</sub>)</b>                |         |    |        |        |           |
| Model                                                                           | 1143.36 | 5  | 228.67 | 81.93  | < 0.0001* |
| Time ( $\tau$ , min)                                                            | 38.66   | 1  | 38.66  | 13.85  | 0.0074*   |
| Temperature (T, °C)                                                             | 774.30  | 1  | 774.30 | 277.41 | < 0.0001* |
| $\tau$ T                                                                        | 236.85  | 1  | 236.85 | 84.86  | < 0.0001* |
| $\tau^2$                                                                        | 62.76   | 1  | 62.76  | 22.48  | 0.0021*   |
| T <sup>2</sup>                                                                  | 4.47    | 1  | 4.47   | 1.60   | 0.2463**  |
| Residual                                                                        | 19.54   | 7  | 2.79   |        |           |
| Lack of fit                                                                     | 15.92   | 3  | 5.31   | 5.86   | 0.0603**  |
| Pure error                                                                      | 3.62    | 4  | 0.9056 |        |           |
| Total SS                                                                        | 1162.90 | 12 |        |        |           |

\*: significant; \*\*: not significant; PLE: pressurized liquid extraction; RF: response factor; SFE-CO<sub>2</sub>: supercritical carbon dioxide extraction; SS: the sum of square; df: the degree of freedom; MS: mean square; F: Fisher value; Ac: acetone; GAE: gallic acid equivalents; TPC: total phenolic content.

**Table S2.** Analysis of variance of the regression parameters for PLE-EtOH response surface quadratic model of *D. fruticosa* leaves for the response factors PLE-EtOH extract yield (g/100 g of residue after PLE-Ac) and total phenolic content (mg GAE/g of residue after PLE-Ac)

| Source                                                                | SS       | df | MS       | F      | p-value   |
|-----------------------------------------------------------------------|----------|----|----------|--------|-----------|
| <b>RF I: PLE-EtOH extract yield (g/100 g of residue after PLE-Ac)</b> |          |    |          |        |           |
| Model                                                                 | 101.24   | 5  | 20.25    | 111.11 | < 0.0001* |
| Time ( $\tau$ , min)                                                  | 36.46    | 1  | 36.46    | 200.06 | < 0.0001* |
| Temperature (T, °C)                                                   | 58.66    | 1  | 58.66    | 321.88 | < 0.0001* |
| $\tau$ T                                                              | 1.56     | 1  | 1.56     | 8.54   | 0.0223*   |
| $\tau^2$                                                              | 3.98     | 1  | 3.98     | 21.84  | 0.0023*   |
| T <sup>2</sup>                                                        | 2.16     | 1  | 2.16     | 11.86  | 0.0108*   |
| Residual                                                              | 1.28     | 7  | 0.1822   |        |           |
| Lack of fit                                                           | 1.04     | 3  | 0.3465   | 5.87   | 0.0602**  |
| Pure error                                                            | 0.2362   | 4  | 0.0590   |        |           |
| Total SS                                                              | 102.52   | 12 |          |        |           |
| <b>RF II: TPC (mg GAE/g of residue after PLE-Ac)</b>                  |          |    |          |        |           |
| Model                                                                 | 15522.75 | 5  | 3104.55  | 60.75  | < 0.0001* |
| Time ( $\tau$ , min)                                                  | 11429.32 | 1  | 11429.32 | 223.66 | < 0.0001* |
| Temperature (T, °C)                                                   | 2885.55  | 1  | 2885.55  | 56.47  | 0.0001*   |
| $\tau$ T                                                              | 169.91   | 1  | 169.91   | 3.32   | 0.1110**  |
| $\tau^2$                                                              | 57.68    | 1  | 57.68    | 1.13   | 0.3233**  |
| T <sup>2</sup>                                                        | 1013.91  | 1  | 1013.91  | 19.84  | 0.0030*   |
| Residual                                                              | 357.71   | 7  | 51.10    |        |           |
| Lack of fit                                                           | 295.30   | 3  | 98.43    | 6.31   | 0.0536**  |
| Pure error                                                            | 62.41    | 4  | 15.60    |        |           |
| Total SS                                                              | 15880.47 | 12 |          |        |           |

\*: significant; \*\*: not significant; EtOH: ethanol; PLE: pressurized liquid extraction; RF: response factor; SS: the sum of square; df: the degree of freedom; MS: mean square; F: Fisher value; Ac: acetone; EtOH: ethanol; GAE: gallic acid equivalents; TPC: total phenolic content.

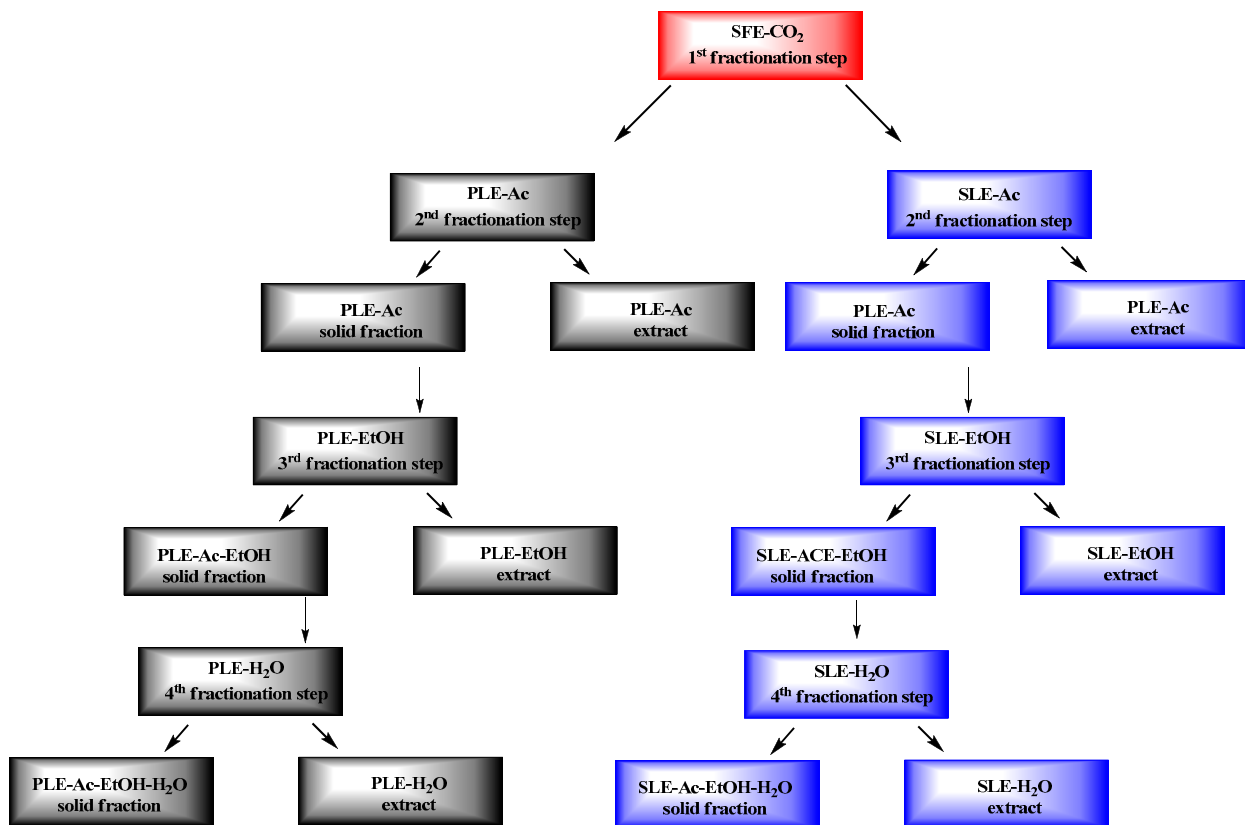

**Figure S1.** Schematic representation of sequential non-polar and polar constituent isolation from *D. fruticosa* leaves applying high-pressure and conventional extraction techniques  
 Ac: acetone; EtOH: ethanol; PLE: pressurized liquid extraction; SFE-CO<sub>2</sub>: supercritical carbon dioxide extraction; SLE: solid-liquid extraction

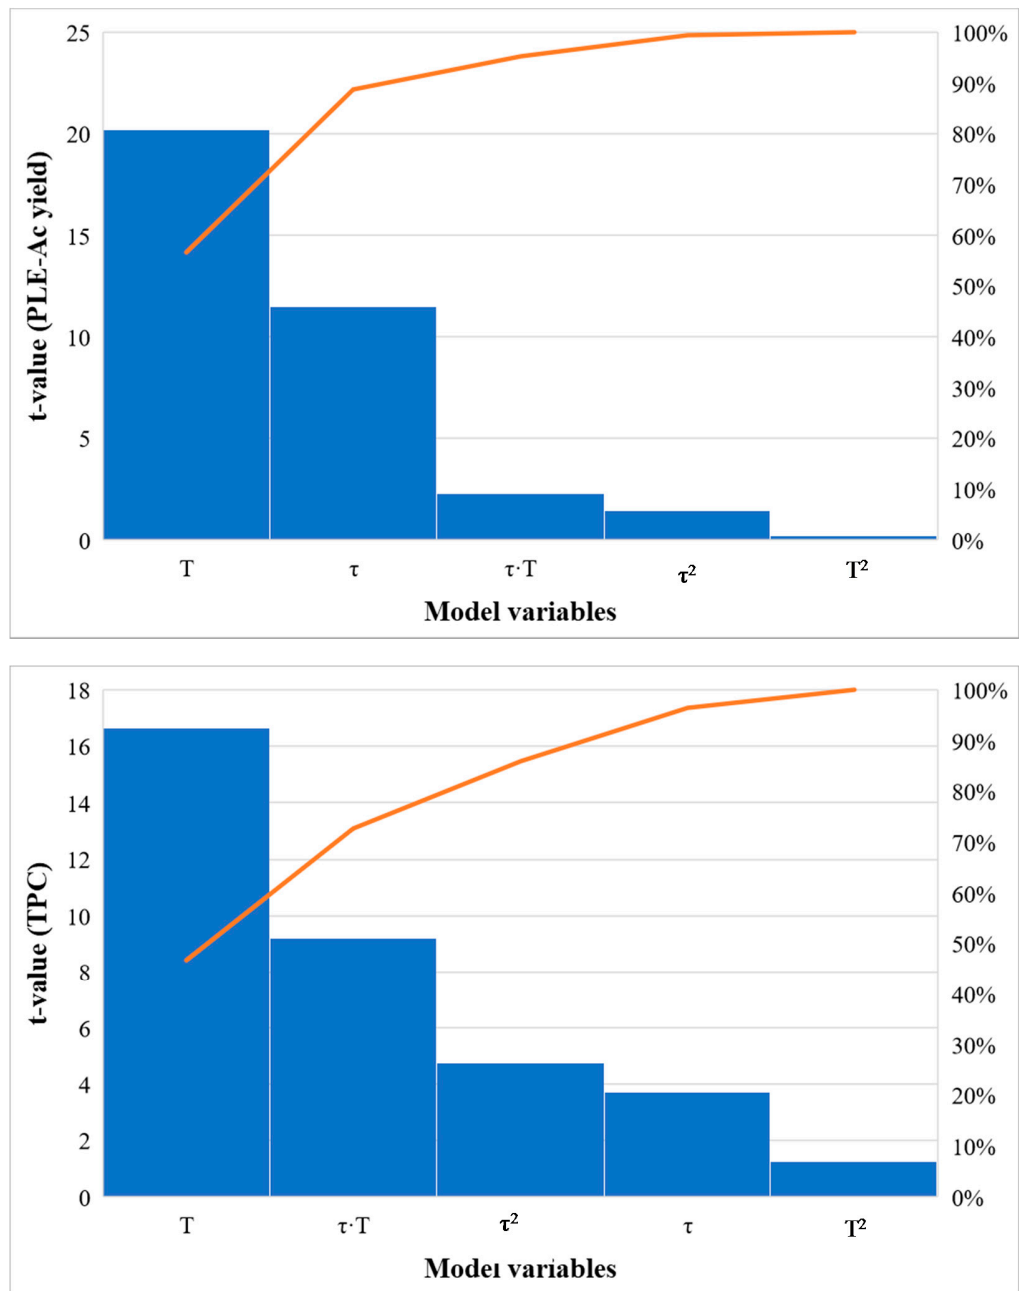

**Figure S2.** Pareto chart ( $p=0.05$ ) for the main effects of PLE-Ac temperature (T) and time ( $\tau$ ) and interactions thereof on the total extraction yield (g/100 g residue after SFE-CO<sub>2</sub>) and total phenolic content (TPC, mg GAE/g residue after SFE-CO<sub>2</sub>)

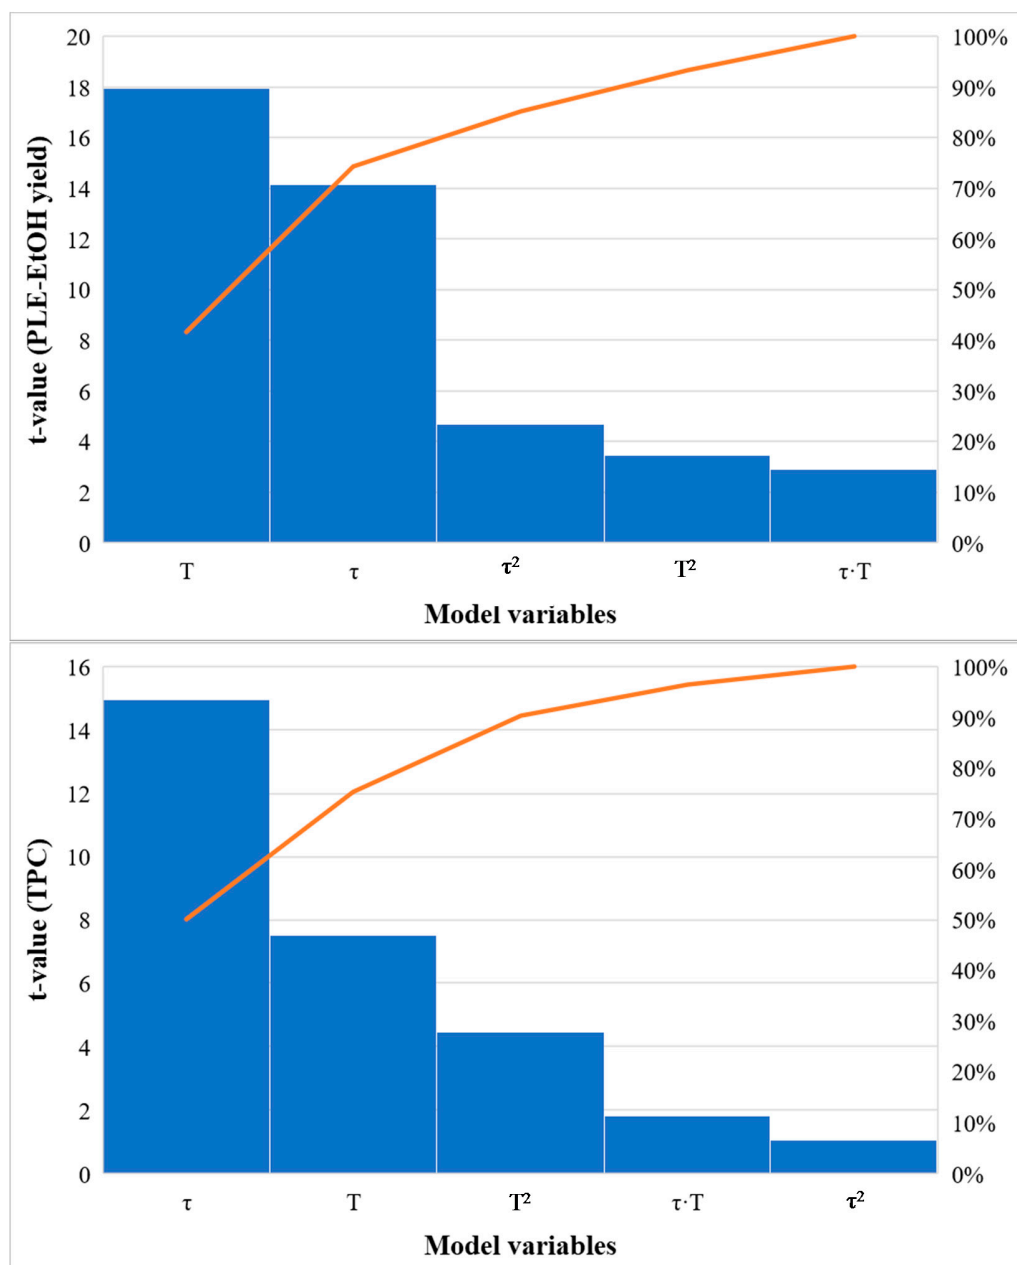

**Figure S3.** Pareto chart ( $p = 0.05$ ) for the main effects of PLE-EtOH temperature (T) and time ( $\tau$ ) and interactions thereof on the total extraction yield (g/100 g residue after PLE-Ac) and total phenolic content (TPC, mg GAE/g residue after PLE-Ac)
